# Supplementary material
Source: publisher figshare collection journal article supplement (https://gsajournals.figshare.com/articles/dataset/_/11714511)
Supplement: Supplementary file 1 [file 2]

**Table S1.**

Mapping of Y chromosome genes to fertility factor intervals.

| Region <sup>[b]</sup> | Size <sup>[c]</sup> | Fertility Factor <sup>[a]</sup> | Known Genes                                                                     |
|-----------------------|---------------------|---------------------------------|---------------------------------------------------------------------------------|
| A                     | 14%                 | <i>kl-5</i>                     | <i>PP1-Y1</i><br><i>kl-5</i><br><i>PRY</i>                                      |
| B                     | 8%                  | <i>kl-3</i>                     | <i>PRY</i><br><i>kl-3</i>                                                       |
| C                     | 5%                  | <i>kl-2</i>                     | <i>kl-2</i><br><i>ARY</i><br><i>Su(Ste)</i> <sup>[d]</sup><br><i>Ppr-Y</i>      |
| D                     | 3%                  | <i>kl-1</i>                     | <i>Ppr-Y</i><br><i>WDY</i><br><i>Su(Ste)</i> <sup>[d]</sup>                     |
| E                     | 10%                 |                                 | <i>CENTROMERE</i><br><i>FDY</i><br><i>Mst77</i> <sup>[d]</sup><br><i>Pp1-Y2</i> |
| F                     | 5%                  | <i>ks-1</i>                     | <i>ORY</i>                                                                      |
| G                     | 3%                  | <i>ks-2</i>                     | <i>CCY</i>                                                                      |

[a] Fertility factors were originally defined by X-ray mutagenesis (Brosseau 1960).

[b] Regions were designated A-G by Hardy et al (Hardy *et al.* 1981) and are defined by segmental deletions (Kennison 1981).

[c] Size estimates are based on a “breakage map” or the fraction of translocation breakpoints that fall within the region (Kennison 1981).

[d] *Su(Ste)* and *Mst77* are multi-copy genes. *CG41561* is a single copy Y-linked gene but has not been mapped to a fertility factor interval.

**Table S2.**

Fly stocks used in this study.

| Fly Lines             | Genotype                                                 | Source                                                                          |
|-----------------------|----------------------------------------------------------|---------------------------------------------------------------------------------|
| Canton S              | wildtype                                                 | lab stock                                                                       |
| Oregon-R<br>modENCODE | wildtype                                                 | BL# 25211                                                                       |
| $\widehat{XX}$        | <i>FM7a/Y/C(1)M4,y</i>                                   | BL# 988                                                                         |
| $\widehat{XY}$        | <i>C(1;Y)1,y/0; ry</i>                                   | BL# 4408                                                                        |
| <i>Bam-Gal4</i>       | <i>w Protamine-GFP, w+ ;;<br/>Bam-Gal4, UAS-Dicer</i>    | See references <sup>[a]</sup> . Combined into<br>one stock by Caroline Sartain. |
| <i>vig2</i>           | <i>w; FRT2A FRT82B<br/>PBac{GAL4D,EYFP}vig2[PL00470]</i> | BL# 19518                                                                       |

[a] (Chen and McKearin 2003; Manier *et al.* 2010)

**Table S3.**

Primer sequences used in this study.

SgRNA sequences are underlined, Cas9 cut sites are indicated with an asterisk, and extra Gs that were added for the optimal T7 promoter are indicated in red.

| Gene       | Primer     | Sequence                                                                      | Notes                                                                                                |
|------------|------------|-------------------------------------------------------------------------------|------------------------------------------------------------------------------------------------------|
| <b>CCY</b> | Forward    | ATCGCGTTTTGTTGCCGATTTAGTGGC                                                   | 914bp WT PCR product, touchdown PCR protocol used                                                    |
|            | Reverse    | TCTCTAATCCTTTGCTTTGTCAACT                                                     |                                                                                                      |
|            | Guide 1    | GAAATTAATACGACTCACTATA <u>G</u> GCTATCGAG<br>CCGGCATC*GAAGTTTTAGAGCTAGAAATAGC | extra G (in red) added for optimal T7 promoter                                                       |
|            | Guide 3    | GAAATTAATACGACTCACTATA <u>G</u> GCTACAATC<br>GAGATAAT*GCTGTTTTAGAGCTAGAAATAGC | extra G (in red) added for optimal T7 promoter                                                       |
|            | Guide 4    | GAAATTAATACGACTCACTATA <u>G</u> GCTGAATAT<br>CGTTTATG*TATGTTTTAGAGCTAGAAATAGC | extra G (in red) added for optimal T7 promoter                                                       |
|            | Forward RT | GAGAGCTCACCTACATGCAT                                                          | 200bp WT cDNA PCR product                                                                            |
|            | Reverse RT | GGTATCGCAACAAAACGTGG                                                          |                                                                                                      |
| <b>PRY</b> | Forward    | TCTCTGTAAGTGCTGGTCCCAGTAGAG                                                   | 971bp WT PCR product                                                                                 |
|            | Reverse    | AAAATGCCATGCATGTGCTAACCTGG                                                    |                                                                                                      |
|            | Guide 2.7  | GAAATTAATACGACTCACTATA <u>G</u> GCAGCATGA<br>CGCGTAGTGTCGTTTTAGAGCTAGAAATAGC  | extra G (in red) added for optimal T7 promoter                                                       |
|            | Guide 2.3  | GAAATTAATACGACTCACTATA <u>G</u> GTTGAGGGT<br>TTACCTGTGGAGTTTTAGAGCTAGAAATAGC  | extra G (in red) added for optimal T7 promoter                                                       |
|            | Forward RT | CGGAAGGTGATCCAATAAATGAGC                                                      | 89bp WT cDNA PCR product, touchdown PCR protocol used                                                |
|            | Reverse RT | GACATTTTCGATATCTTCCTCGGGG                                                     |                                                                                                      |
| <b>FDY</b> | Forward    | CCCTGTTCAAAAACCAACAACCGCTCA                                                   | 953bp WT PCR product, 5 bases of forward and 1 base of reverse primer differ in <i>vig2</i> sequence |
|            | Reverse    | TGTTGCCAAGGGTTGCGTTGTCTCTAT                                                   |                                                                                                      |
|            | 3' Forward | AACTTCAATGATGGCCGCAAGGTCTG                                                    | 1175bp WT PCR product, 1 base of forward differs in <i>vig2</i> seq, reverse primer is not similar   |
|            | 3' Reverse | CGGGAGCGAGCGGAAAGAGAGCA                                                       |                                                                                                      |
|            | Guide 1.12 | GAAATTAATACGACTCACTATA <u>G</u> GAGCAACTT<br>ACGCACCA*CGCGTTTTAGAGCTAGAAATAGC | extra G (in red) added for optimal T7 promoter, identical sequence in <i>vig2</i>                    |
|            | Guide 2.1  | GAAATTAATACGACTCACTATAGGACCACCAC<br>GCGTCCG*TTCGTTTTAGAGCTAGAAATAGC           | 1 base is different in <i>vig2</i> sequence                                                          |

**Table S3 continued.**

| Gene                  | Primer                    | Sequence                                                                                    | Notes                                                                                                    |
|-----------------------|---------------------------|---------------------------------------------------------------------------------------------|----------------------------------------------------------------------------------------------------------|
| <b><i>Vig2</i></b>    | Forward                   | TCAGGCCGAAGAGGACAGAGAATTTTCG                                                                | 1579bp WT PCR product, 3 bases of reverse primer differ in <i>FDY</i> seq, forward primer is not similar |
|                       | Reverse                   | GTCTGTTTTTCATAGCCGTTGCTGGGTC                                                                |                                                                                                          |
|                       | Forward RT                | GGATCCGATAGAACTGGCGTCAAG                                                                    | 105bp WT cDNA PCR product, 1 base differs from <i>FDY</i> in both forward and reverse primer             |
|                       | Reverse RT                | CCCGGTCGTCTTTAAGTCCTCA                                                                      |                                                                                                          |
| <b>Generic</b>        | Reverse - guide synthesis | AAAAAAAGCACCGACTCGGTGCCACTT<br>TTTCAAGTTGATAACGGACTAGCCTTAT<br>TTTAACTTGCTATTTCTAGCTCTAAAAC | Used together with guide primers                                                                         |
| <b><i>Actin5c</i></b> | Forward RT                | AGCGCGGTTACTCTTTCACCAC                                                                      | 103bp WT PCR product                                                                                     |
|                       | Reverse RT                | GTGGCCATCTCCTGCTCAAAGT                                                                      |                                                                                                          |
| <b><i>RpL32</i></b>   | Forward RT                | CACCAGTCGGATCGATATGC                                                                        | 120bp WT PCR product                                                                                     |
|                       | Reverse RT                | CGATCCGTAACCGATGTTG                                                                         |                                                                                                          |
| <b><i>Pp1-Y2</i></b>  | Forward                   | TGTTTTCATGCTTGCCTTTGGACGACG                                                                 | 1128bp WT PCR product                                                                                    |
|                       | Reverse                   | CCCCCAAAGAAGCGCAATATGTCACTG                                                                 |                                                                                                          |
| <b><i>WDY</i></b>     | Forward                   | TGAGATGGTATCTTGCGTTTACTTTTC                                                                 | 837bp WT PCR product                                                                                     |
|                       | Reverse                   | ACTTCTTGGTCTGGCATTATACTCATA                                                                 |                                                                                                          |
| <b><i>ARY</i></b>     | Forward                   | GCTTCGTGGATATCAATGCTCGGCAGC                                                                 | 775bp WT PCR product                                                                                     |
|                       | Reverse                   | TGACTTGCAGAGCGCTTGTA CTCTT                                                                  |                                                                                                          |

**Table S4.**Number of females and mean counts from each *PRY* group (Allele x Repeat).

|                 | <i>PRY</i> |            |            |            |            |            | Control for <i>PRY</i> |            |            |            |            |            |
|-----------------|------------|------------|------------|------------|------------|------------|------------------------|------------|------------|------------|------------|------------|
| Allele          | G5.7       |            | G54.1      |            | G54.7      |            | A1                     |            | A2         |            | B1         |            |
| Repeat          | 1          | 2          | 1          | 2          | 1          | 2          | 1                      | 2          | 1          | 2          | 1          | 2          |
| # Eggs / Female |            |            |            |            |            |            |                        |            |            |            |            |            |
| Day 1           | 45.83      | 38.18      | 44.07      | 41.39      | 45.31      | 30.27      | 41.80                  | 46.00      | 51.29      | 46.05      | 53.00      | 39.75      |
| Day 2           | 46.92      | 42.06      | 44.20      | 38.61      | 45.77      | 41.67      | 48.47                  | 49.81      | 60.71      | 48.09      | 58.50      | 50.10      |
| Day 3           | 53.67      | 39.12      | 45.40      | 39.22      | 47.38      | 42.33      | 54.00                  | 56.44      | 47.14      | 45.50      | 61.10      | 59.40      |
| Day 4           | 43.25      | 43.94      | 43.87      | 37.89      | 45.08      | 50.67      | 52.93                  | 50.88      | 47.00      | 39.14      | 53.80      | 54.95      |
| Day 5           | 39.58      | 34.41      | 48.20      | 36.89      | 49.62      | 41.47      | 50.87                  | 37.31      | 54.29      | 29.64      | 53.20      | 52.65      |
| Total           | 229.2<br>5 | 197.7<br>1 | 225.7<br>3 | 194.0<br>0 | 233.1<br>5 | 206.4<br>0 | 248.0<br>7             | 240.4<br>4 | 260.4<br>3 | 208.4<br>1 | 279.6<br>0 | 256.8<br>5 |
| # Pupa / Female |            |            |            |            |            |            |                        |            |            |            |            |            |
| Day 1           | 5.08       | 4.65       | 12.60      | 6.28       | 7.77       | 5.80       | 38.33                  | 35.25      | 48.00      | 34.23      | 46.00      | 36.80      |
| Day 2           | 0.67       | 0.88       | 0.73       | 1.22       | 0.38       | 1.00       | 45.67                  | 41.00      | 52.71      | 34.73      | 54.20      | 42.70      |
| Day 3           | 0.25       | 0.12       | 0.13       | 0.67       | 0.38       | 0.47       | 35.67                  | 28.06      | 42.00      | 30.45      | 50.60      | 38.70      |
| Day 4           | 0.17       | 0.12       | 0.00       | 0.56       | 0.08       | 0.00       | 29.60                  | 19.00      | 39.71      | 18.55      | 32.20      | 30.35      |
| Day 5           | 0.00       | 0.12       | 0.33       | 0.00       | 0.00       | 0.00       | 24.20                  | 9.00       | 50.14      | 12.09      | 23.40      | 18.70      |
| Total           | 6.17       | 5.88       | 13.80      | 8.72       | 8.62       | 7.27       | 173.4<br>7             | 132.3<br>1 | 232.5<br>7 | 130.0<br>5 | 206.4<br>0 | 167.2<br>5 |
| N               | 12         | 17         | 15         | 18         | 13         | 15         | 15                     | 16         | 7          | 22         | 10         | 20         |

**Table S5.**Number of females and mean counts from each *FDY* group (Allele x Repeat).

|                 | <i>FDY</i> |            |            |            |            |            | Control for <i>FDY</i> |            |            |            |            |            |
|-----------------|------------|------------|------------|------------|------------|------------|------------------------|------------|------------|------------|------------|------------|
| Allele          | L3.2       |            | L64.3      |            | L71.4      |            | A                      |            | C          |            | E          |            |
| Repeat          | 1          | 2          | 1          | 2          | 1          | 2          | 1                      | 2          | 1          | 2          | 1          | 2          |
| # Eggs / Female |            |            |            |            |            |            |                        |            |            |            |            |            |
| Day 1           | 40.61      | 44.85      | 41.53      | 35.57      | 43.44      | 39.86      | 37.13                  | 46.20      | 43.23      | 45.62      | 43.07      | 35.82      |
| Day 2           | 25.28      | 37.23      | 22.82      | 25.29      | 27.56      | 30.93      | 20.07                  | 27.47      | 27.38      | 21.69      | 35.43      | 30.94      |
| Day 3           | 18.50      | 34.54      | 18.88      | 19.29      | 21.75      | 21.00      | 20.33                  | 34.73      | 28.23      | 18.23      | 44.93      | 38.53      |
| Day 4           | 15.17      | 28.00      | 16.18      | 19.71      | 17.63      | 18.57      | 13.93                  | 32.60      | 17.46      | 19.77      | 36.93      | 49.24      |
| Day 5           | 12.17      | 17.31      | 15.88      | 5.71       | 20.56      | 11.00      | 8.67                   | 17.40      | 15.46      | 12.00      | 39.57      | 30.12      |
| Total           | 111.7<br>2 | 161.9<br>2 | 115.2<br>9 | 105.5<br>7 | 130.9<br>4 | 121.3<br>6 | 100.1<br>3             | 158.4<br>0 | 131.7<br>7 | 117.3<br>1 | 199.9<br>3 | 184.6<br>5 |
| # Pupa / Female |            |            |            |            |            |            |                        |            |            |            |            |            |
| Day 1           | 36.39      | 39.38      | 38.94      | 33.43      | 40.38      | 35.50      | 33.00                  | 42.07      | 41.23      | 43.31      | 40.93      | 30.53      |
| Day 2           | 25.33      | 33.54      | 22.06      | 24.79      | 26.50      | 28.00      | 18.93                  | 28.13      | 27.38      | 21.46      | 34.00      | 28.47      |
| Day 3           | 15.78      | 27.92      | 17.35      | 17.36      | 19.13      | 17.79      | 18.27                  | 31.93      | 24.00      | 17.31      | 43.29      | 33.88      |
| Day 4           | 12.28      | 23.92      | 15.00      | 17.07      | 16.56      | 16.86      | 12.40                  | 29.20      | 15.23      | 18.54      | 36.29      | 38.71      |
| Day 5           | 10.06      | 14.54      | 15.59      | 5.21       | 18.94      | 7.86       | 7.73                   | 14.53      | 13.69      | 10.54      | 32.64      | 25.41      |
| Total           | 99.83      | 139.3<br>1 | 108.9<br>4 | 97.86      | 121.5<br>0 | 106.0<br>0 | 90.33                  | 145.8<br>7 | 121.5<br>4 | 111.1<br>5 | 187.1<br>4 | 157.0<br>0 |
| N               | 18         | 13         | 17         | 14         | 16         | 14         | 15                     | 15         | 13         | 13         | 14         | 17         |

**Table S6.**

p-values from Kruskal-Wallis Rank Sum Test to compare the independent alleles of each genotype.

|                        |              | <b>Control for<br/><i>PRY</i></b> | <b><i>PRY</i></b> | <b>Control for<br/><i>FDY</i></b> | <b><i>FDY</i></b> |
|------------------------|--------------|-----------------------------------|-------------------|-----------------------------------|-------------------|
| <b># Eggs / Female</b> | <b>Day 1</b> | 0.65762                           | 0.30374           | 0.71674                           | 0.80181           |
|                        | <b>Day 2</b> | 0.92863                           | 0.75028           | 0.22442                           | 0.56031           |
|                        | <b>Day 3</b> | 0.11878                           | 0.96518           | 0.02269 *                         | 0.92516           |
|                        | <b>Day 4</b> | 0.15507                           | 0.62343           | 0.00142 ***                       | 0.82582           |
|                        | <b>Day 5</b> | 0.03306 *                         | 0.50622           | 0.00036 ***                       | 0.52639           |
|                        | <b>Total</b> | 0.70840                           | 0.22076           | 0.51583                           | 0.83841           |
| <b># Pupa / Female</b> | <b>Day 1</b> | 0.64033                           | 0.55454           | 0.34498                           | 0.74190           |
|                        | <b>Day 2</b> | 0.29890                           | 0.33600           | 0.02213 *                         | 0.95450           |
|                        | <b>Day 3</b> | 0.23414                           | 0.33668           | 0.02693 *                         | 0.96757           |
|                        | <b>Day 4</b> | 0.75713                           | 0.22503           | 0.00092 ***                       | 0.87822           |
|                        | <b>Day 5</b> | 0.20480                           | 0.95535           | 0.02507 *                         | 0.84271           |
|                        | <b>Total</b> | 0.43658                           | 0.08452           | 0.06744                           | 0.95793           |

\* p<0.05, \*\*\* p<0.01

**Table S7.**

p-values from Wilcoxon Rank Sum Test to compare the mean fertility and fecundity of mutants compared to controls.

|                        |              | <b><i>PRY</i> vs Control</b> | <b><i>FDY</i> vs Control<br/>(all)</b> | <b><i>FDY</i> vs Control<br/>(Control E omitted)</b> |
|------------------------|--------------|------------------------------|----------------------------------------|------------------------------------------------------|
| <b># Eggs / Female</b> | <b>Day 1</b> | 0.06106                      | 0.74746                                | 0.59194                                              |
|                        | <b>Day 2</b> | 0.01374 *                    | 0.70744                                | 0.22769                                              |
|                        | <b>Day 3</b> | 0.00544 ***                  | 0.01536 *                              | 0.33008                                              |
|                        | <b>Day 4</b> | 0.13900                      | 0.00852 ***                            | 0.41788                                              |
|                        | <b>Day 5</b> | 0.24883                      | 0.03361 *                              | 0.95870                                              |
|                        | <b>Total</b> | 0.02499 *                    | 0.06369                                | 0.63515                                              |
| <b># Pupa / Female</b> | <b>Day 1</b> | 0.00000 ***                  | 0.68494                                | 0.57829                                              |
|                        | <b>Day 2</b> | 0.00000 ***                  | 0.92065                                | 0.42998                                              |
|                        | <b>Day 3</b> | 0.00000 ***                  | 0.00995 ***                            | 0.23949                                              |
|                        | <b>Day 4</b> | 0.00000 ***                  | 0.02292 *                              | 0.36537                                              |
|                        | <b>Day 5</b> | 0.00000 ***                  | 0.04824 *                              | 0.95859                                              |
|                        | <b>Total</b> | 0.00000 ***                  | 0.06968                                | 0.55841                                              |

\* p<0.05, \*\*\* p<0.01



**Table S8.**

p-values from Levene Test for homogeneity of variance around the mean of mutants compared to controls.

|                 |       | <i>PRY</i> vs Control | <i>FDY</i> vs Control<br>(all) | <i>FDY</i> vs Control<br>(Control E omitted) |
|-----------------|-------|-----------------------|--------------------------------|----------------------------------------------|
| # Eggs / Female | Day 1 | 0.67016               | 0.79047                        | 0.24197                                      |
|                 | Day 2 | 0.00885 ***           | 0.39501                        | 0.04996 *                                    |
|                 | Day 3 | 0.00000 ***           | 0.00989 ***                    | 0.23477                                      |
|                 | Day 4 | 0.03562 *             | 0.00025 ***                    | 0.58438                                      |
|                 | Day 5 | 0.02306 *             | 0.00573 ***                    | 0.38211                                      |
|                 | Total | 0.00000 ***           | 0.65741                        | 0.08378                                      |
| # Pupa / Female | Day 1 | 0.00000 ***           | 0.36859                        | 0.03618 *                                    |
|                 | Day 2 | 0.00000 ***           | 0.00852 ***                    | 0.47207                                      |
|                 | Day 3 | 0.00000 ***           | 0.00023 ***                    | 0.49856                                      |
|                 | Day 4 | 0.00000 ***           | 0.02190 *                      | 0.28833                                      |
|                 | Day 5 | 0.00457 ***           | 0.01266 *                      | 0.95503                                      |
|                 | Total | 0.00000 ***           | 0.04587 *                      | 0.47835                                      |

\* p<0.05, \*\*\* p<0.01

**Table S9.**Fertility of *FDY-vig2* double mutants.

| Genotype                              | # Males That Produce Progeny At 25°C |      |                    | # Males That Produce Progeny At 19°C |      |                    |
|---------------------------------------|--------------------------------------|------|--------------------|--------------------------------------|------|--------------------|
|                                       | #                                    | %    |                    | #                                    | %    |                    |
| <i>w / Y, Control</i> ;; + ; +        | 18/19                                | 95%  | <b>Not Sterile</b> | 19/20                                | 95%  | <b>Not Sterile</b> |
| <i>w / Y, FDY L3.2</i> ;; + ; +       | 14/20                                | 70%  | <b>Not Sterile</b> | 20/20                                | 100% | <b>Not Sterile</b> |
| <i>w / Y, Control</i> ;; <i>vig2</i>  | 19/19                                | 100% | <b>Not Sterile</b> | 17/18                                | 94%  | <b>Not Sterile</b> |
| <i>w / Y, FDYL 3.2</i> ;; <i>vig2</i> | 18/18                                | 100% | <b>Not Sterile</b> | 16/18                                | 85%  | <b>Not Sterile</b> |

**Table S10.**

Summary of all CCY alleles with visible INDELs.

| <b>Allele</b> | <b>Fertility</b> | <b>BP<br/>Inserted</b> | <b>BP<br/>Deleted</b> | <b>Total BP<br/>Change</b> | <b>Effect</b> | <b>Guide Site<br/>Altered</b> |
|---------------|------------------|------------------------|-----------------------|----------------------------|---------------|-------------------------------|
| I6.2          | not sterile      | 0                      | 6                     | -6                         | In frame      | 3                             |
| I6.3          | not sterile      | 1                      | 10                    | -9                         | In frame      | 3                             |
| I6.4          | not sterile      | 2                      | 2                     | 0                          | In frame      | 3                             |
| I6.6          | not sterile      | 0                      | 6                     | -6                         | In frame      | 3                             |
| I8.7          | not sterile      | 0                      | 6                     | -6                         | In frame      | 3                             |
| I8.12         | not sterile      | 0                      | 6                     | -6                         | In frame      | 3                             |
| I10.2         | not sterile      | 0                      | 6                     | -6                         | In frame      | 3                             |
| I15.2         | not sterile      | 3                      | 3                     | 0                          | In frame      | 3                             |
| I15.10        | not sterile      | 3                      | 3                     | 0                          | In frame      | 3                             |
| I6.9          | sterile          | 7                      | 18                    | -11                        | Out of frame  | 3                             |
| I8.2          | sterile          | 0                      | 5                     | -5                         | Out of frame  | 3                             |
| I8.4          | sterile          | 9                      | 5                     | -4                         | Out of frame  | 3                             |
| I8.5          | sterile          | 0                      | 5                     | -5                         | Out of frame  | 3                             |
| I10.1         | sterile          | 0                      | 10                    | -10                        | Out of frame  | 3                             |
| I10.3         | sterile          | 17                     | 7                     | 10                         | Out of frame  | 3                             |
| I10.4         | sterile          | 18                     | 8                     | 10                         | Out of frame  | 3                             |
| I15.7         | sterile          | 0                      | 2                     | -2                         | Out of frame  | 3                             |
| I17.4         | sterile          | 0                      | 25                    | -25                        | Out of frame  | 3                             |
