# Supplementary material
Source: publisher figshare collection journal article supplement (https://gsajournals.figshare.com/articles/dataset/_/11714511)
Supplement: Supplementary file 2 [file 2]

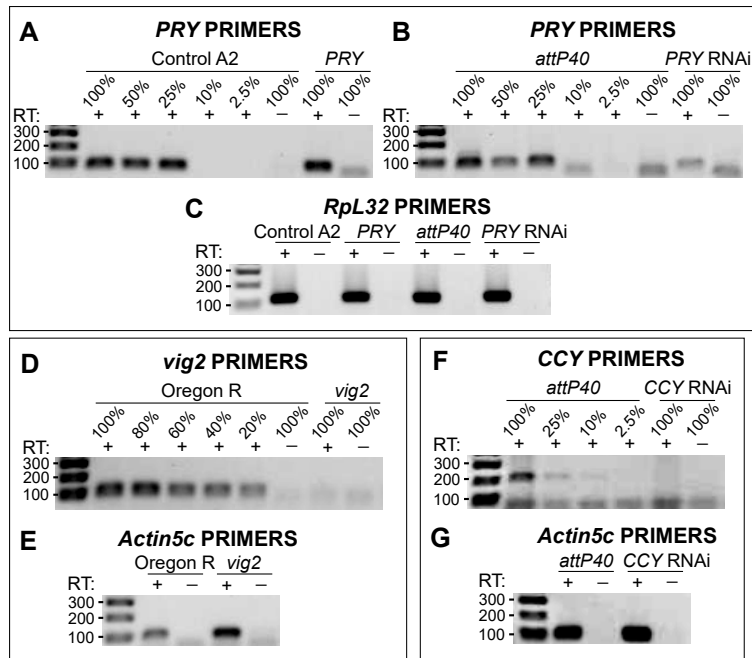

**Figure S4.** Semi-quantitative RT-PCR to estimate transcript levels.

cDNA was prepared from the following samples: (A-C) whole adult males, (D,E) whole adult females, (F,G) testes of adult males. PCRs were performed with the indicated gradients of cDNA concentration to estimate changes in transcript levels. We included a no reverse transcriptase (RT) control to detect any genomic DNA contamination in the cDNA samples. Knockdown of RNAi lines was tested in flies with a Bam-Gal4 driver and either *UAS-RNAi* or the respective *attP* control (B,C,F,G).
