# Supplementary material
Source: publisher figshare collection journal article supplement (https://gsajournals.figshare.com/articles/dataset/_/11714511)
Supplement: Supplementary file 3 [file 2]

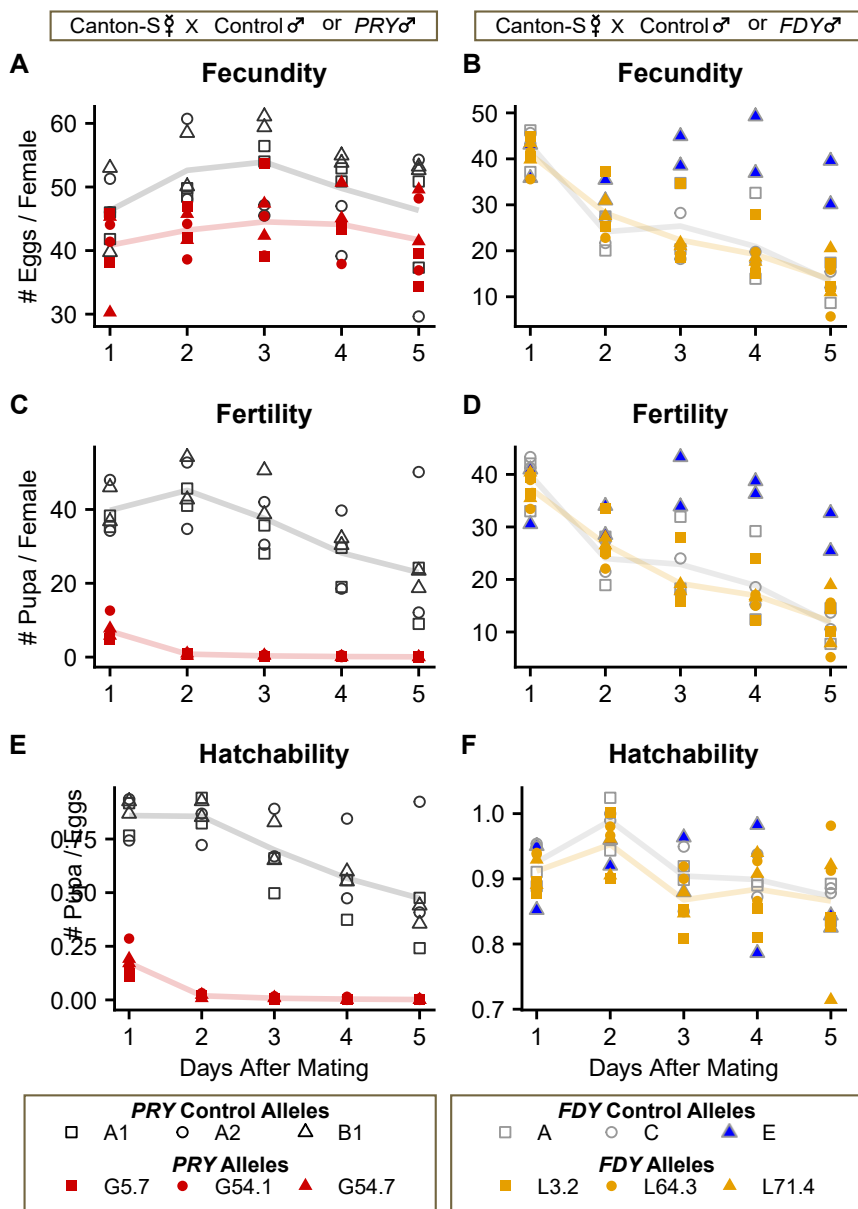

**Figure S5.** Fertility, fecundity and hatchability by allele. (A,B) Fecundity (number of eggs laid), (C,D) fertility (number of pupa produced), and (E,F) hatchability (fertility/fecundity) of Canton-S virgin females crossed to *PRY* (A,C,E) or *FDY* (B,D,F) mutant males or their respective controls. Shapes indicate the allele. The overall mean of all the alleles and repeats of each genotype are indicated by the lines. *FDY*'s control allele E (blue triangles) is an outlier and was omitted.
