# Supplementary material
Source: publisher figshare collection journal article supplement (https://gsajournals.figshare.com/articles/dataset/_/11714511)
Supplement: Supplementary file 4 [file 2]

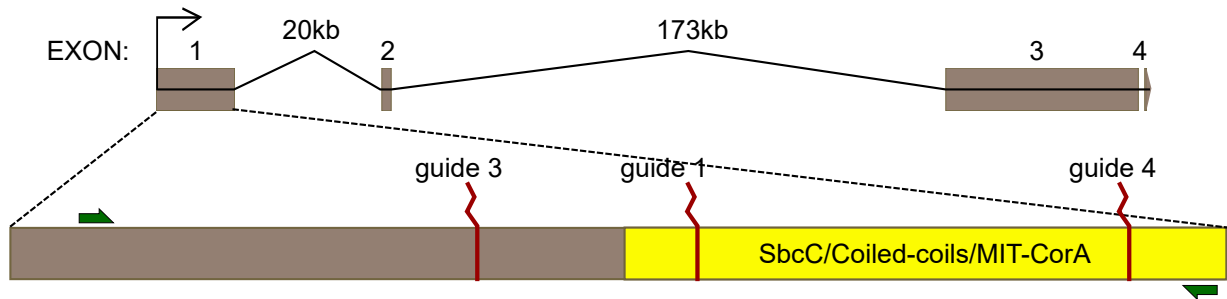

**Figure S3.** CRISPR-targeting of CCY.

CCY gene diagram with zoomed-in view of exon 1 showing the primer sites (green arrows) and the sgRNA sites (red lines) referenced in the text. Overlapping conserved SbcC, Coiled-coils, and MIT-CorA domains are depicted as one (yellow).
