# Supplementary material
Source: publisher figshare collection journal article supplement (https://gsajournals.figshare.com/articles/dataset/_/11714511)
Supplement: Supplementary file 5 [file 2]

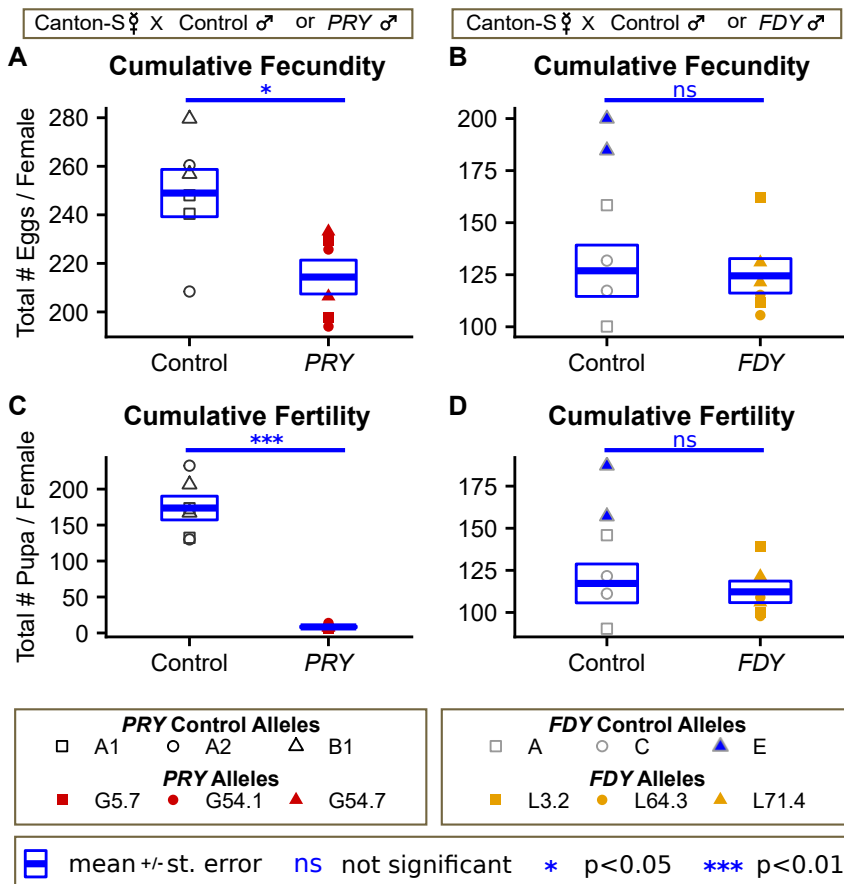

**Figure S6.** Cumulative effects of *PRY* and *FDY* activity on fertility and fecundity over the first five days post-mating.

(A,B) Number of eggs laid over five days (cumulative fecundity) and (C,D) number of pupae produced over five days (cumulative fertility) by Canton-S females mated to males of each genotype. Each point represents the mean from a single repeat of a single allele, with the allele indicated by symbol shape. There are six such groups for each genotype. The standard error and overall mean of these groups are indicated by the box and crossbar, respectively. Results of the Wilcoxon Rank Sum Test for significant differences between genotypes are indicated in blue. \* p<0.05, \*\*\* p<0.01, ns = not significant. *FDY*'s control allele E (blue triangles) is an outlier and was omitted.
