# Supplementary material
Source: publisher figshare collection journal article supplement (https://gsajournals.figshare.com/articles/dataset/_/11714511)
Supplement: Supplementary file 6 [file 2]

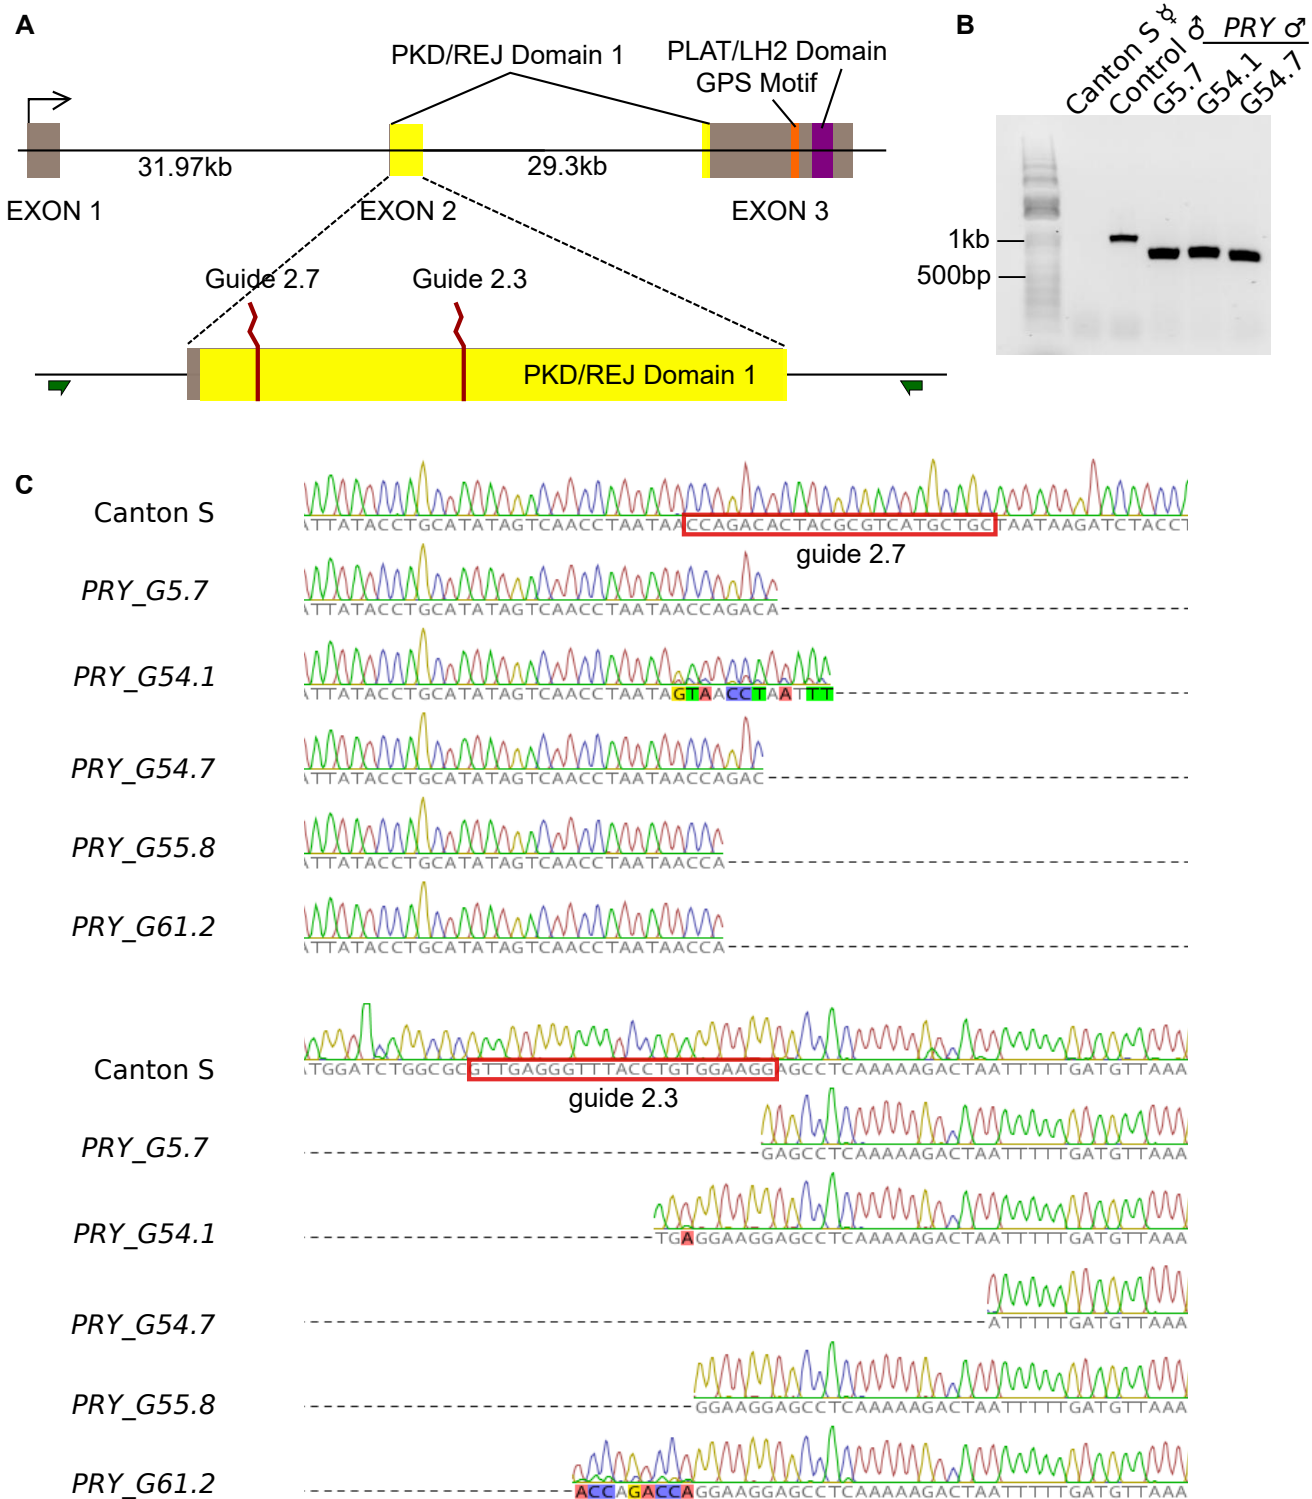

**Figure S1.** CRISPR-targeting of *PRY*.

A. Diagram of the *PRY* gene, with a zoomed view of exon 2, showing the conserved domains and locations of the sgRNAs (red lines) and primers (green arrows) used for targeting the gene with CRISPR. B. PCR bands showing decreased size of PCR product in mutants with the intended deletion. C. Sequencing traces to molecularly characterize the deletion responsible for each allele.
