# Supplementary material
Source: publisher figshare collection journal article supplement (https://gsajournals.figshare.com/articles/dataset/_/11714511)
Supplement: Supplementary file 7 [file 2]

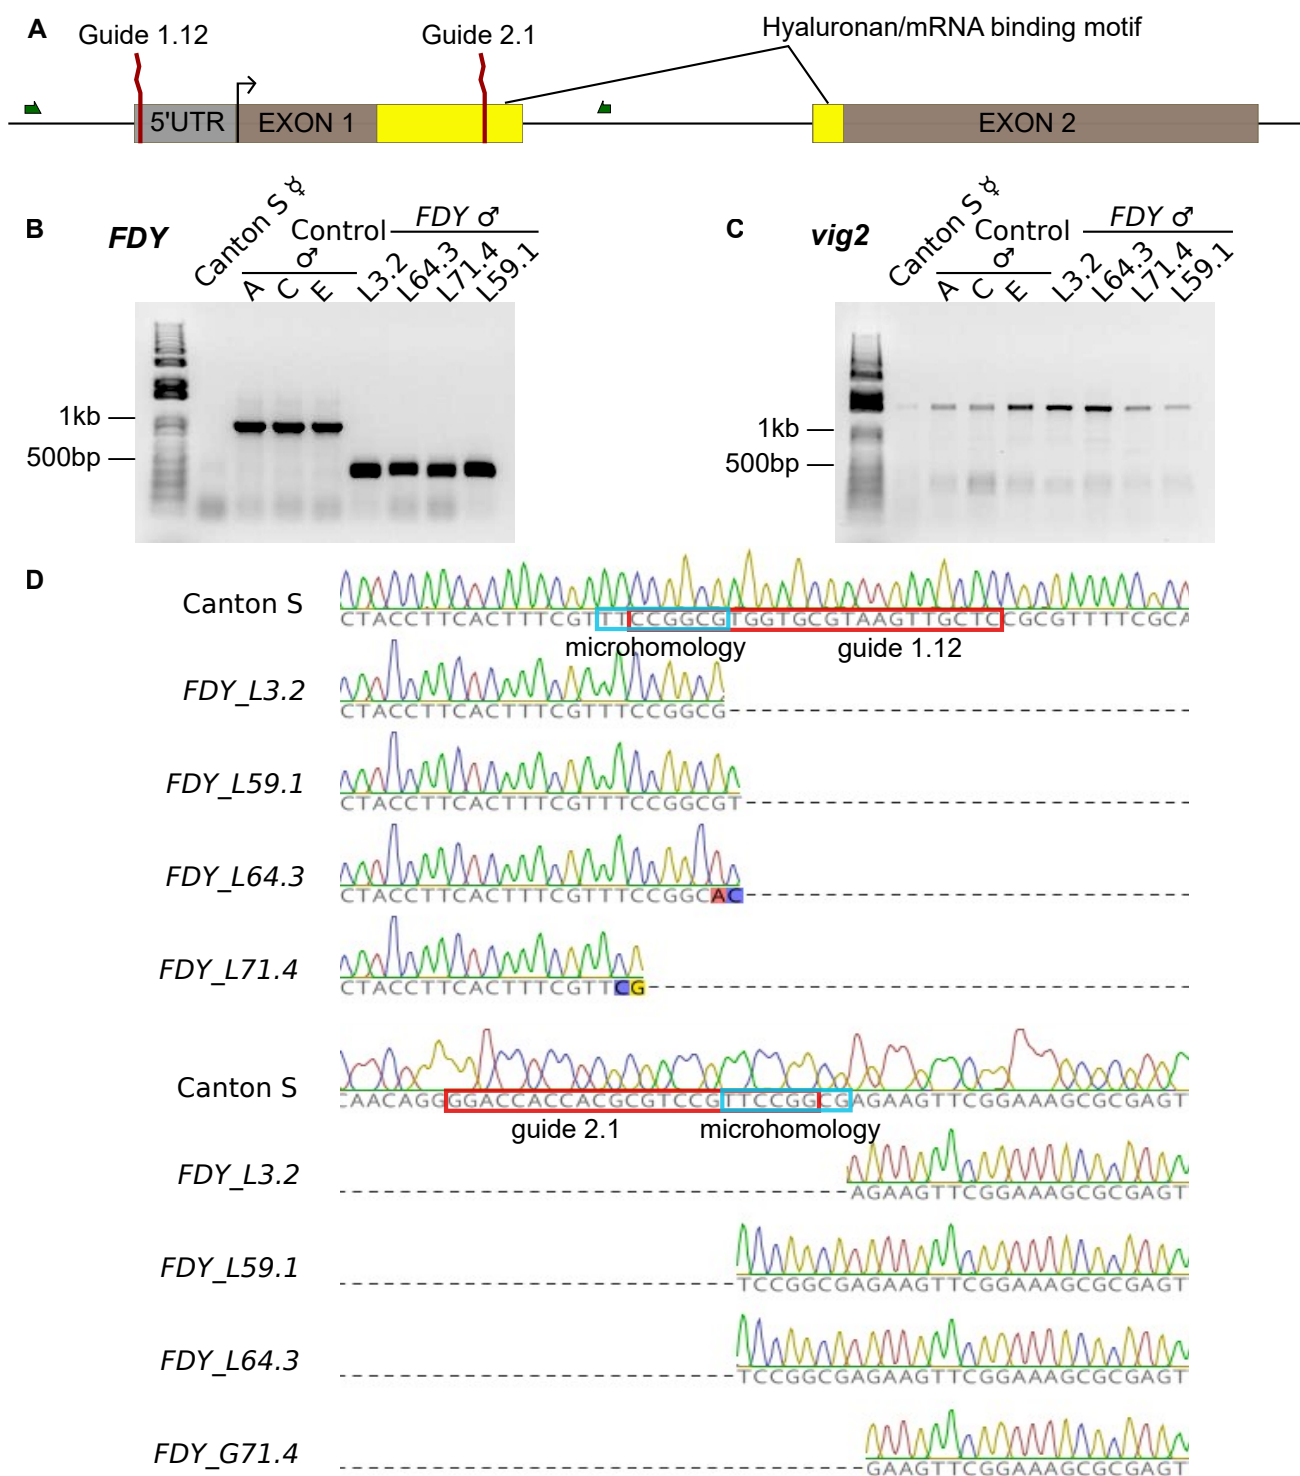

**Figure S2.** CRISPR-targeting of *FDY*.

A. Diagram of the *FDY* locus indicating locations of a conserved Hyaluronan/mRNA-binding motif (yellow), sgRNAs (red lines) and primers (green arrows). B. PCR confirmation of ~500bp deletion in *FDY* in the retained mutants. C. PCR confirmation of intact *vig2* in the retained mutants. D. Sequencing traces to molecularly characterize the deletion in *FDY* alleles. Two regions of microhomology (blue boxes) were identified, one near each sgRNA site, and likely explain why the exact same molecular changes were observed in several independently derived alleles.
